# Supplementary figures and images for: Diverse Requirements for Src-Family Tyrosine Kinases Distinguish Chlamydial Species
Source: PubMed Central journal article supplement — mBio. 2011 Mar 22;2(2):e00031-11. doi: 10.1128/mBio.00031-11 (PMC3063380; doi:10.1128/mbio.00031-11), 2011-03-22

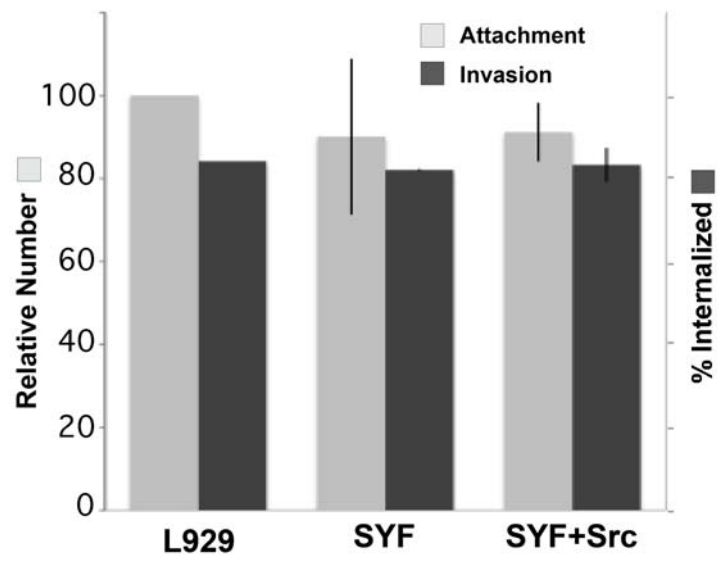

Supplement: mBio.00031-11-sf01.pdf [file mBio.00031-11-sf01.pdf]

**+CAM**

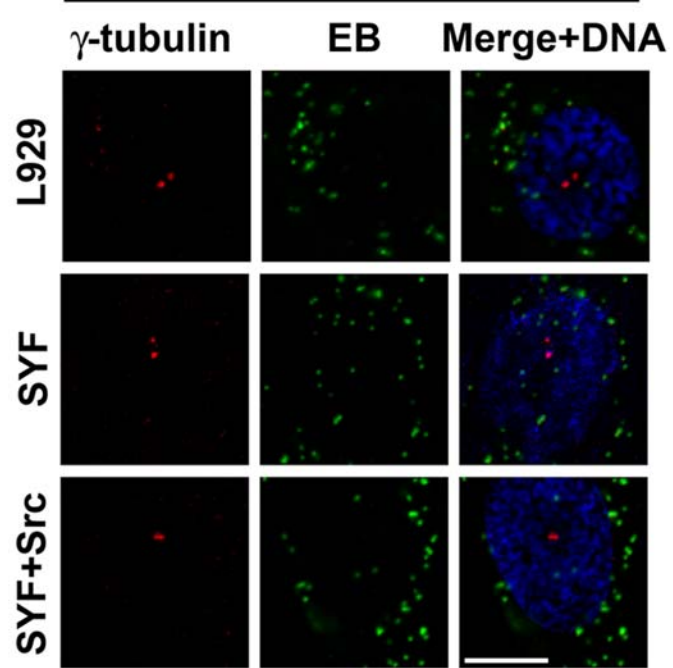

Supplement: mBio.00031-11-sf02.pdf [file mBio.00031-11-sf02.pdf]

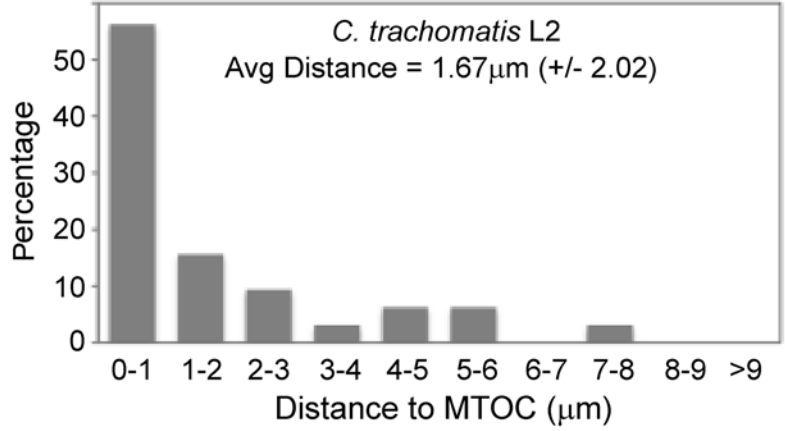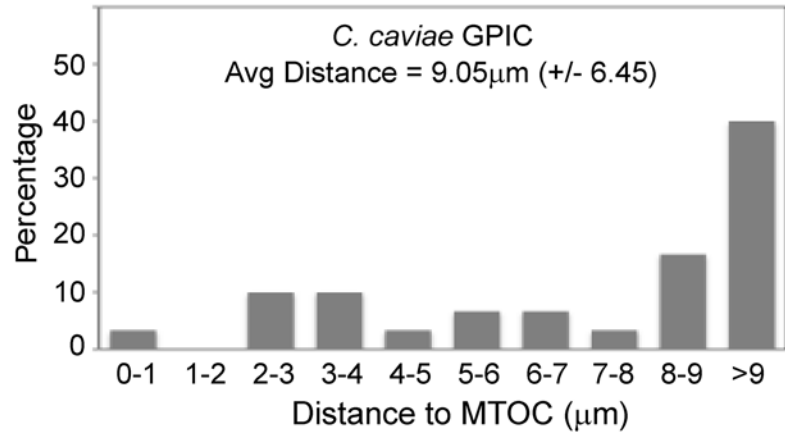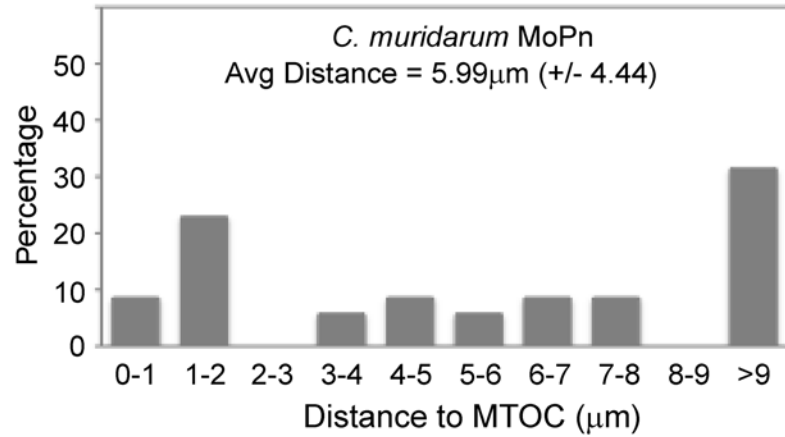

Supplement: mBio.00031-11-sf03.pdf [file mBio.00031-11-sf03.pdf]

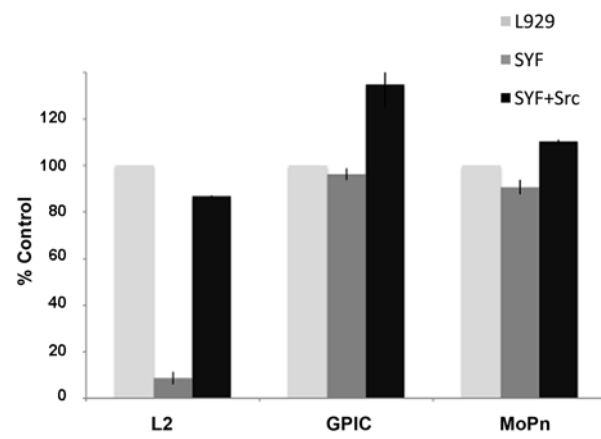

Supplement: mBio.00031-11-sf04.pdf [file mBio.00031-11-sf04.pdf]

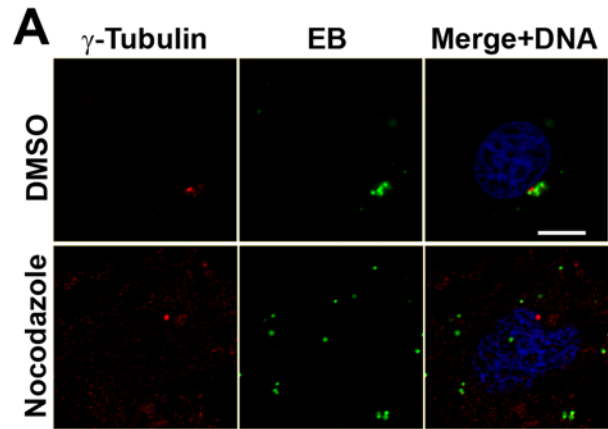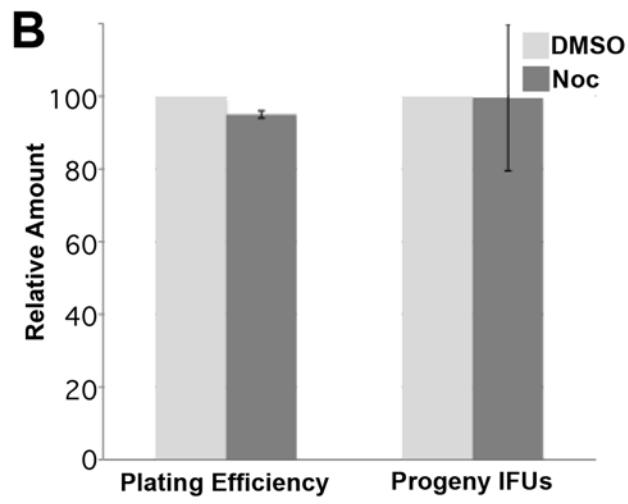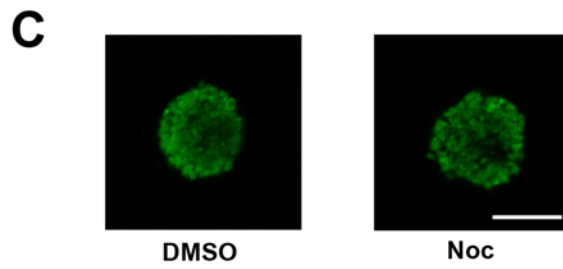

Supplement: mBio.00031-11-sf05.pdf [file mBio.00031-11-sf05.pdf]

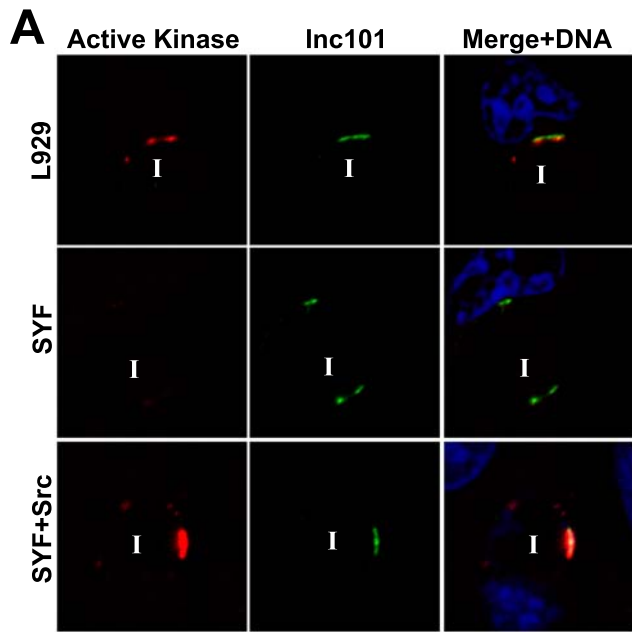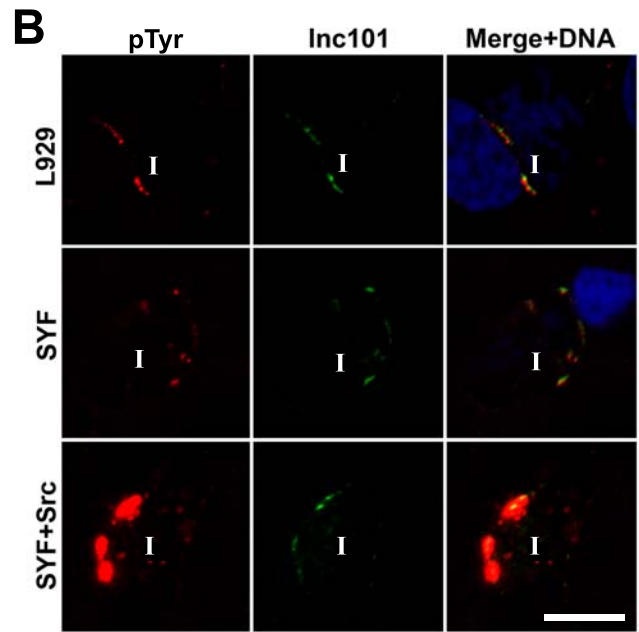

Supplement: mBio.00031-11-sf06.pdf [file mBio.00031-11-sf06.pdf]

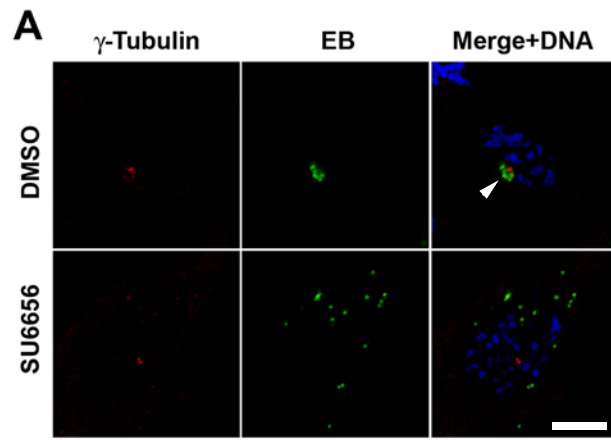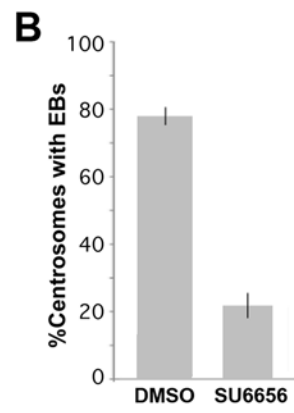

Supplement: mBio.00031-11-sf07.pdf [file mBio.00031-11-sf07.pdf]
